1 **Three-dimensional morphological analysis of the dynamic digestive system in the green**

2 **brittle star**

3 Daiki Wakita<sup>1</sup>, Keisuke Naniwa<sup>2</sup>, and Hitoshi Aonuma<sup>1,2\*</sup>

4 <sup>1</sup>Graduate School of Life Science, Hokkaido University, Sapporo 0600810, Japan

5 <sup>2</sup>Research Institute for Electronic Science, Hokkaido University, Sapporo 0600812, Japan

6

7 \*Corresponding author: Hitoshi Aonuma, D.Sc.,

8 Research Institute for Electronic Science, Hokkaido University, Sapporo 0600812, Japan.

9 Tel/Fax: +81-117063832, Email: aon@es.hokudai.ac.jp

10

11

## Abstract

12 Brittle stars (Echinodermata: Ophiuroidea) digest a great diversity of food in their stomach,  
13 which widely lies in the central disk. As for a possible digestive activity, the green brittle star  
14 *Ophiarachna incrassata* is known to show a dynamic movement at the disk. This  
15 phenomenon would deeply involve the morphological structure of the stomach. However,  
16 past anatomical studies have shown the digestive system in two dimensions after wide  
17 incision of the body wall anchoring the stomach. This methodology restrains us from  
18 understanding how the stomach actually shapes inside a brittle star. We aim to visualize the  
19 morphology of brittle stars' digestive system in a non-destructive and three-dimensional way,  
20 with a comparison between a relaxed specimen and a specimen fixed at the very moment of  
21 the disk's movement. Employing X-ray micro-computed tomography (micro-CT) and  
22 introducing an instant freezing method with cryogenic ethanol, we found the stomach wholly  
23 transformed during the movement. We here brought transparency to the *in vivo* position of gut  
24 contents to hint the mechanism and digestive function of the movement. Our outcome  
25 spotlights a dynamic digestive process in echinoderms and a widely applicable method for  
26 probing into its relation with body structure.

27

28

## Keywords

29 marine invertebrate, echinoderm, ophiuroid, stomach anatomy, feeding behavior, X-ray  
30 micro-computed tomography, instant freezing

31

32

## Introduction

33 More than 2,300 species of brittle stars (Echinodermata: Ophiuroidea) are known worldwide  
34 and constitute the largest class among extant echinoderms (Stöhr et al. 2019). Diversity in  
35 feeding habits could be an explanatory factor for the current success of this group (Fontaine,  
36 1965). Their food varies in sort and scale, from sediment or small organisms including  
37 diatoms, dinoflagellates, foraminifera, and copepods, to the whole or part of large organisms  
38 such as polychaetes, bivalves, crabs, fish, other echinoderms, and sessile algae  
39 (Nagabhushanam & Colman, 1959; Fontaine, 1965; Hendler & Miller, 1984; Pearson & Gage,  
40 1984; Ambrose, 1993). Their radially extending arms play a role in capturing food (Fontaine,  
41 1965; Warner, 1971; Reimer & Reimer, 1975; Hendler & Miller, 1984), and then internal  
42 digestive organs take center stage.

43 Contrary to the various targets in feeding, brittle stars share the general structure of  
44 the digestive system. Its mouth is followed in order by buccal cavity, pharynx, esophagus, and  
45 stomach (Schechter & Lucero, 1968). Lacking intestine and anus, it terminates with the  
46 stomach, which occupies a large space inside the disk—central part of the body (Smith, 1940;  
47 Schechter & Lucero, 1968; Pentreath, 1971; Uchida & Irimura, 1974). The stomach consists  
48 of a single sac radially dividing into 10 pouches: five radial (ambulacral) pouches and five  
49 interradial (interambulacral) pouches (Pentreath, 1969). We also read a contradicting  
50 statement that brittle stars' stomach totally has 15 swellings in a common context (Uchida &  
51 Irimura, 1974). Interradial pouches are well-folded structure deeply lying between the bases  
52 of arms, whereas radial pouches are limited in narrow spaces over arms (Pentreath, 1969,  
53 1971; Uchida & Irimura, 1974). These pouches never extend into arms except the species  
54 *Ophiocanops fugiens* Koehler, 1922 (Fell, 1963).

55           Over and above anatomical studies, a dynamic perspective of digestion has been  
56 discussed based on live observation. In the green brittle star *Ophiarachna incrassata*  
57 (Lamarck, 1816), Wakita et al. (2018) reported a rhythmic movement termed “*pumping*”  
58 (Video S1; c.f. Fig. 1), which is frequently observed at the disk after feeding. The series of  
59 expansion and shrinkage can be recognized as a sort of peristaltic movement of the stomach.  
60 Its unique coordinated patterns are explainable by assuming internal fluid flows, the way of  
61 which depends on the morphology of the disk. In particular, five-armed individuals make  
62 unsynchronized movements between five body parts, whereas those are well synchronized in  
63 a six-armed case—peculiar individual difference in brittle stars. Thus, in this phenomenon,  
64 the morphological structure of the stomach may be of great importance, although it is unclear  
65 how pumping transforms it.

66           In previous studies, the morphological structure of the digestive system in brittle  
67 stars has been visualized only by two-dimensional sketches or tissue sections (Smith, 1940;  
68 Pentreath, 1969, 1971; Schechter & Lucero, 1968; Uchida & Irimura, 1974; Frolova &  
69 Dolmatov, 2006, 2010). Moreover, traditional anatomy has employed a wide dissection of the  
70 body wall, which considerably distorts the morphology in focus. This issue arises from the  
71 fragileness of digestive organs as well as its deep attachment to the body wall by collagen  
72 strands (Schechter & Lucero, 1968; Uchida & Irimura, 1974). The aim of our study is to  
73 visualize non-destructive and three-dimensional (3D) morphological structure of the digestive  
74 system in brittle stars, in comparative terms of a relaxed condition and a condition during  
75 pumping. For this purpose, we employ X-ray micro-computed tomography (micro-CT) while  
76 introducing an instant freezing method using cryogenic ethanol for making a *snapshot* of the  
77 dynamically moving body (Fig. 1). We also probe into the internal morphology of the

78 six-armed specimen studied by Wakita et al. (2018), so as to internally validate the prior  
79 assumption that this specific individual has six symmetrical units—previously it was made up  
80 merely in external terms. The primary conclusion in our study is that pumping could  
81 transform the entire stomach to help digestion in large brittle stars, with its coordinated  
82 patterns apparently reflecting five- or six-fold symmetrical arrangement in internal  
83 morphology.

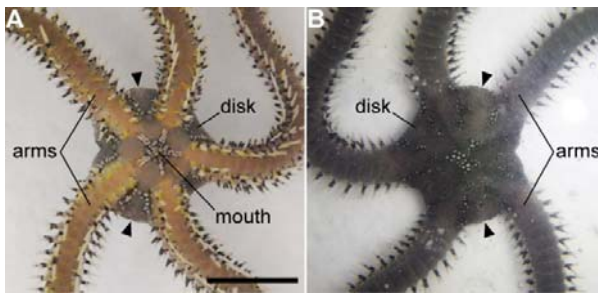

84

85 **Fig. 1** Frozen individual at the moment of the dynamic movement “pumping” in the green  
86 brittle star *Ophiarachna incrassata*. (A) Oral view. (B) Aboral view. Photos were taken just  
87 after pouring  $-80^{\circ}\text{C}$  ethanol while we observed pumping at the disk. Arrowheads denote  
88 well-expanding portions. Scale bars represent 10 mm. Scanned and segmented images of this  
89 specimen are shown in Fig. 3. Video of another individual’s pumping is shown in Video S1.

90

## 91 **Methods**

### 92 **Animals**

93 Individuals of the green brittle star *Ophiarachna incrassata* were obtained commercially  
94 (Aqua Shop Saien, Sapporo, Japan) and reared in aquariums ( $600 \times 600 \times 600$  mm) filled  
95 with artificial seawater at  $25\text{--}28^{\circ}\text{C}$  with the salinity of 32–35‰ (TetraMarin Salt Pro, Tetra  
96 Japan Co, Tokyo, Japan). They were fed with dried krill (Tetra Krill-E, Tetra Japan Co,  
97 Tokyo, Japan).

## 98 **X-ray micro-computed tomography**

99 With the aim to investigate relaxed and pumping bodies as well as five- and six-armed bodies,  
100 we chose three individuals: (1) a five-armed individual a day after feeding, with the disk  
101 diameter of 15 mm in a living anesthetized condition; (2) a five-armed individual a week after  
102 feeding, with the disk diameter of 18 mm; (3) a six-armed individual with the diameter of 25  
103 mm, which had hardly shown feeding behavior for a few months. The six-armed one  
104 corresponds to that studied by Wakita et al. (2018). For the relaxed case, the animals (1) and  
105 (3) each were anaesthetized in 3% MgCl<sub>2</sub> solution for an hour at room temperature and then  
106 fixed with Bouin solution—(1) for 10 days and (3) for five months—at 3°C with their arms  
107 cut near the bases. For looking into the pumping body, the animal (2) was put in a styrofoam  
108 box (127 × 157 × 100 mm) with 100–200 ml of artificial seawater and then fed with a dried  
109 krill. While we observed the rhythmic movement (pumping; c.f. Video S1), –80°C ethanol  
110 was poured onto the disk so that the animal (2) kept a momentary shape with expansion and  
111 shrinkage (Fig. 1). After slowly shaking the box for 10 min, the sample was put in Bouin  
112 solution for a day at 3°C with their arms cut.

113 After fixation, all the samples (1)–(3) were dehydrated with ethanol series (70%,  
114 80%, and 90%) for two days each, and stained with 1% iodine diluted in ethanol for three  
115 days at 3°C to enhance the contrast of tissues in later X-ray exposure (Metscher, 2009). They  
116 were rinsed with 100% ethanol for a day at room temperature and then moved into *t*-butyl  
117 alcohol liquidized with a water bath above 40°C. After immersion in *t*-butyl alcohol for a day  
118 twice at 26°C, samples were superficially dried on tissues for several seconds and then put at  
119 –20°C for 10 min so that instantly frozen *t*-butyl alcohol would keep the original morphology  
120 as possible. They were freeze-dried by using a vacuum evaporator (PX-52, Yamato Ltd.,

121 Japan) with a cold alcohol trap (H<sub>2</sub>SO<sub>5</sub>, AS ONE, Japan). All chemicals were purchased from  
122 Kanto Chemical Co. (Tokyo, Japan).

123 Samples were scanned on an X-ray micro-CT system (inspeXio, SMX-100CT,  
124 Shimadzu Corporation, Kyoto, Japan), where X-ray source was operated at 75 kV and 40  $\mu$ A.  
125 Scanned images were reconstructed and rendered by using VGStudio MAX ver. 2.2.6  
126 (Volume Graphics, Heidelberg, Germany) with the voxel size of 10–50  $\mu$ m. For segmentation  
127 of each sample using Amira ver. 2019.1 (Thermo Scientific, Waltham, USA), we traced the  
128 inner surface—boundary with contrasting X-ray absorptivity—of the digestive cavity  
129 beginning from the mouth. Note that segmentation was not available in regions where the  
130 inner wall stuck to each other so that the cavity was too flat to be identified. We also  
131 segmented gut contents, which were recognizable as highly absorptive areas inside the cavity.  
132 3D animations were created with VGStudio MAX for slice images and Amira for segmented  
133 images, which are given in Videos S2–4.

134

## 135 **Results**

136 The morphology of the digestive system, particularly the stomach, was well visualized by  
137 segmenting the inner wall of the digestive cavity (Figs 2–4). In the five-armed specimen fixed  
138 after anesthesia (Video S2), skeletal structure comprised five symmetrical sectors in  
139 appearance (Fig. 2A). The cavity's surface was smoothly defined from the mouth to the  
140 stomach (Fig. 2B), so we required less subjectivity in the segmentation (Fig. 2C–E). The  
141 stomach comprised five larger interradial pouches and five smaller radial pouches (Fig. 2C).  
142 As noted in Methods, no region in a totally flat cavity was segmented, hence the gaps forming  
143 a cobweb-like structure could be interpreted as the missing flattened parts of the stomach, not

144 representing there were many holes in morphology (Fig. 2C). The stomach was plain in the  
145 aboral side (Fig. 2C,D) but well wrinkled in the oral (Fig. 2E). Viewed orally, a ridge could be  
146 traced along each midline of two sorts of pouches, which descended into several branches  
147 (Fig. 2E). Interradial pouches narrowed at the bases with their breadth increasing distally,  
148 with the end being round so that we could trace smoothly between the oral and aboral surfaces  
149 (Fig. 2C–E). Radial pouches were more flat, shaped along arm skeletal plates, and made distal  
150 ends with rough and sharp edges (Fig. 2D,E). The distal parts of interradian pouches extended  
151 until near the oral wall, whereas their bases and radial pouches were restricted aborally (Fig.  
152 2D). The oral room at the center contained a jaw apparatus and its peripheral organs, which  
153 would include the circumoral nerve ring and the water vascular system (Fig. 2A,B). In this  
154 specimen, two large pieces of food were respectively observed at the aboral base of an  
155 interradian pouch—might be partially shared by one adjacent radial pouch—and the oral end  
156 of another interradian (Fig. 2C–E).

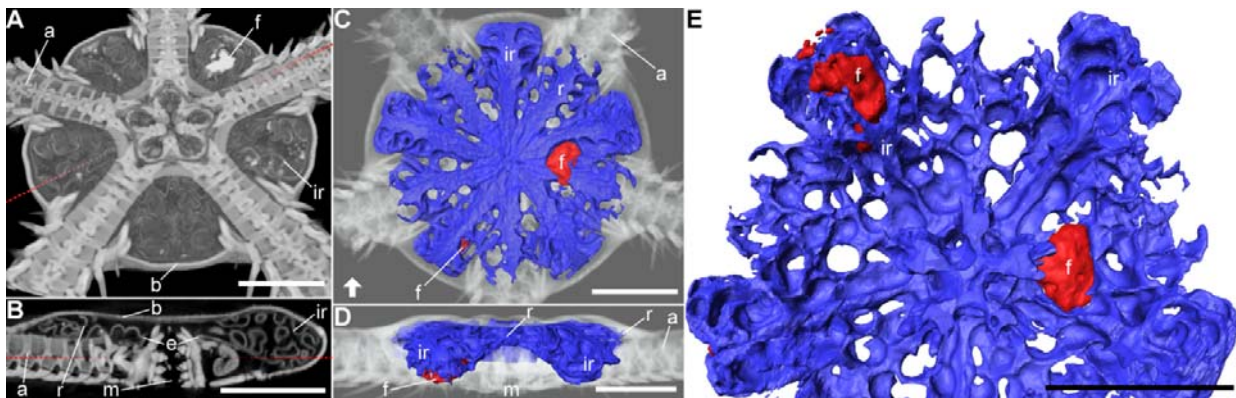

157  
158 **Fig. 2** Three-dimensional visualization of the digestive system in a five-armed relaxed  
159 individual of the green brittle star *Ophiarachna incrassata*. Body structure was scanned with  
160 X-ray micro-computed tomography (micro-CT) and reconstructed in three dimensions, which  
161 is displayed in grayscale. The inner surface of the digestive cavity beginning from the mouth



162 is colored blue. Contents in the stomach are colored red. Regions where the inward cavity was  
163 totally flat were not segmented (not colored blue) with a technical limitation, which reflects  
164 the apparent holes of the stomach and the apparent exposure of gut contents. (A)  
165 Reconstructed images viewed from the oral side, sectioned at a plane shown in (B) by the  
166 dotted line. (B) Oral-aboral section on a plane indicated in (A) by the dotted line; the bottom  
167 is oral; slab thickness is 0.38  $\mu\text{m}$ . (C) Aboral view of the segmented model. (D) Lateral view  
168 of the segmented model from the side indicated in (C) by the arrow; the bottom is oral; the  
169 grayscale images are truncated in the front for clarity. (E) Enlarged oral view of the  
170 segmented model. Abbreviations: a, arm skeleton; b, body wall; e, esophagus; f, food (gut  
171 content); m, mouth; ir, interradial pouch; r, radial pouch. Scale bars represent 5 mm.  
172 Three-dimensional animation is shown in Video S2.

173 In the specimen frozen during pumping (Video S3), we found no noticeable damage  
174 due to the instant freezing method in external and internal morphology (Figs 1 and 3A).  
175 Besides, there seemed to be no large difference in the texture of the digestive wall in scanned  
176 images, compared to those observed in the relaxed one. We recognized a well-defined  
177 separation between the mouth and the stomach and a tight closure of the mouth (Fig. 3B; see  
178 the esophagus “e” and the mouth “m”), so we did not clearly identify the continuous space  
179 from the mouth opening. However, we had no ambiguity in segmenting the internal surface  
180 which was recognizable as the stomach’s one (Fig. 3C–E) when comparing to the relaxed case  
181 (Fig. 2C–E). The stomach wall during pumping was smoothly fitted to the distorted body wall  
182 with less obvious folding (Fig. 3C). The globular shaping of the stomach was also upheld  
183 from the observation that we saw no network-like segmentation denoting flattened patches  
184 (Fig. 3C), contrasting to the relaxed one (Fig. 2C). Expansions were remarkable in interradial

185 pouches, which directed toward the aboral and lateral sides (Fig. 3D). Meanwhile, radial  
186 pouches at their neighbors also became more or less open (Fig. 3D). The oral surface likewise  
187 showed an entire extension, where we barely found sharp structure such as branched ridges  
188 (Fig. 3E). The cavity between the body and stomach walls (perivisceral coelom) appeared to  
189 be narrowly limited (Fig. 3B,D), not largely differing from the relaxed case (Fig. 2B,D). A  
190 food lied almost at the center of the stomach in this specimen (Fig. 3C,E).

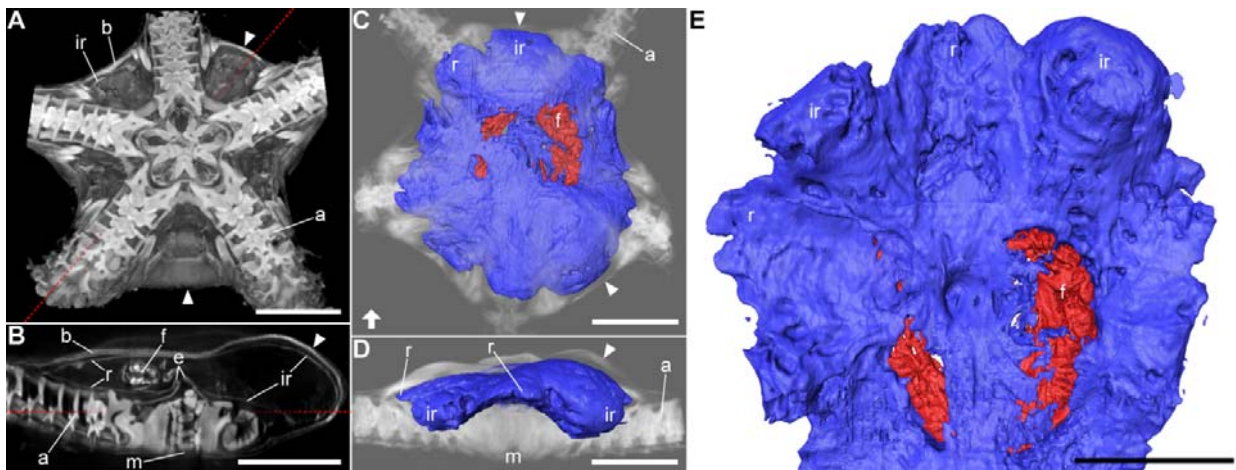

191

192 **Fig. 3** Three-dimensional visualization of the digestive system in a five-armed individual  
193 during the dynamic movement “pumping” in the green brittle star *Ophiarachna incrassata*.  
194 Body structure of an instantly frozen individual shown in Fig. 1 was scanned with X-ray  
195 micro-computed tomography (micro-CT) and reconstructed in three dimensions, which is  
196 displayed in grayscale. The inner wall of the digestive cavity is colored blue, which was  
197 identified in comparison with the relaxed specimen (Fig. 2). Contents in the stomach are  
198 colored red. Regions where the inward cavity was totally flat were not segmented (not colored  
199 blue) with a technical limitation, which reflects the apparent exposure of gut contents.  
200 Arrowheads denote well-expanding portions. (A) Reconstructed images viewed from the oral  
201 side, sectioned at a plane shown in (B) by the dotted line. (B) Oral-aboral section on a plane

202 indicated in (A) by the dotted line; the bottom is oral; slab thickness is 0.36  $\mu\text{m}$ . (C) Aboral  
203 view of the segmented model. (D) Lateral view of the segmented model from the side  
204 indicated in (C) by the arrow; the bottom is oral; the grayscale images are truncated in the  
205 front for clarity. (E) Enlarged oral view of the segmented model. Abbreviations: a, arm  
206 skeleton; b, body wall; e, esophagus; f, food (gut content); m, mouth; ir, interradial pouch; r,  
207 radial pouch. Scale bars represent 5 mm. Three-dimensional animation is shown in Video S3.

208 In the specimen with six arms (Video S4), a jaw apparatus and arm skeletal plates  
209 apparently arranged in six-fold radial symmetry (Fig. 4A). As in the five-armed relaxed case,  
210 the digestive cavity was smoothly traceable from the mouth to the stomach (Fig. 4B). Though  
211 the segmentation, we realized that the inner openings of interradial pouches were almost as  
212 flat as those of radial ones (Fig. 4B). This reduction was probably because this individual had  
213 not fed for a few months before fixation. Although the boundaries between radial and  
214 interradial pouches were less conspicuous (Fig. 4C) than the five-armed ones (Fig. 2C), the  
215 two types could be distinguished when we saw the model from several angles (Fig. 4B,C). In  
216 particular, interradial pouches hung down more orally (Fig. 4B) and showed ridged midlines  
217 on the oral surface (Fig. 4C). Here we could count 12 pouches—six interradial and six radial  
218 pouches (Fig. 4C).

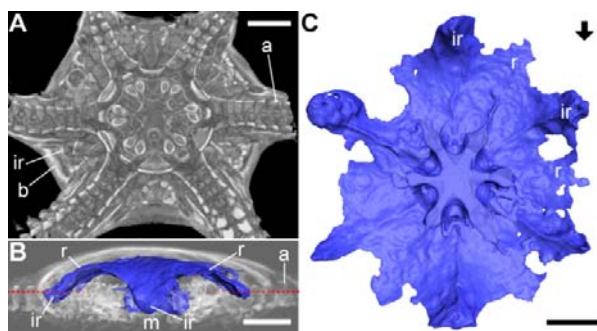

220 **Fig. 4** Three-dimensional visualization of the digestive system in a six-armed relaxed

221 individual of the green brittle star *Ophiarachna incrassata*. Body structure was scanned with  
222 X-ray micro-computed tomography (micro-CT) and reconstructed in three dimensions, which  
223 is displayed in grayscale. The inner wall of the digestive cavity beginning from the mouth is  
224 colored blue. Regions where the inward cavity was totally flat were not segmented (not  
225 colored blue) with a technical limitation. (A) Reconstructed images viewed from the oral side,  
226 sectioned at a plane indicated in (B) by the dotted line. (B) Lateral view of the segmented  
227 model from the side indicated in (C) by the arrow; the bottom is oral; the grayscale images are  
228 truncated in the front for clarity. (C) Oral view of the segmented model. Abbreviations: a, arm  
229 skeleton; b, body wall; ir, interradiar pouch; r, radial pouch. Scale bars represent 5 mm.  
230 Three-dimensional animation is shown in Video S4.

231

232

## Discussion

233 Our study has three main achievements. The first is 3D visualization of the uninjured stomach  
234 in brittle stars (Fig. 2, Video S2). The schematics were directly reconstructed from micro-CT  
235 scanned images, including less imagination than previous sketches. The second is  
236 introduction of a fresh methodology in micro-CT scanning, where we investigated a moving  
237 body's momentary shape made by instant freezing with cryogenic ethanol (Figs 1 and 3,  
238 Video S3). The resultant snapshot provides a further understanding of the previously reported  
239 phenomenon, *pumping* (Wakita et al. 2018), as a possible digestive activity. The last is  
240 internal inspection of the specific six-armed individual studied by Wakita et al. (2018) (Fig. 4,  
241 Video S4). A supernumerary seemed to be simply a member of six equivalents, which helps a  
242 prebuilt assumption on pumping coordination.

243

In a five-armed representative, we counted 10 major swellings in the stomach (Fig.

244 2C) as Pentreath (1969) reported, not supporting another literature writing the total number 15  
245 (Uchida & Irimura, 1974). Since the latter also mentions radial and interradial pouches, it  
246 might be miswriting or another interpretation given the complex folding. The wrinkles  
247 running on the oral surface would be a reflection in part of skeletal morphology and other  
248 organs' anchoring, while probably being capable of a large amount of food by its extension. In  
249 fact, the specimen shown in Fig. 3 accommodates a relatively large food ranging across  
250 several pouches. Although the segmented stomach structure in Fig. 2 looks like a web  
251 network, we can interpret that these holes as untraceable flat parts of the cavity so that  
252 pouches connect with each other throughout the central space.

253           Comparison between the relaxed and pumping specimens in scanned images (Figs 2  
254 and 3) indicates that pumping dynamically transforms the stomach, where it is natural to  
255 suppose internal fluid flows to some extent. The outer space of the stomach (perivisceral  
256 coelom) would make insignificant flows for pumping, considering the constant narrowness  
257 even in the pumping body (Fig. 3B,D). The mouth-stomach separation emerging in the  
258 pumping specimen (Fig. 3B) can be defined as the constriction of esophagus, referring to  
259 Schechter & Lucero (1968). This observation and the tight closure of the jaw  
260 apparatus—surrounding buccal cavity—(Fig. 3B) both would reinforce Wakita et al.'s (2018)  
261 assumption that the total fluid volume is constant during pumping; there is no outward  
262 leakage. Although their study built a water-connecting network with five nodes for the  
263 five-armed case, there could be 10 rooms given the number of pouches (Fig. 2C). However,  
264 the slits between the pouches were actually not deep as depicted in the pumping specimen  
265 (Fig. 3C). With this texture, the five-fold arm skeleton would rather work as partitions (Fig.  
266 3A,B), making it reasonable to represent five rooms influencing the major behavior of

267 internal flows. This explanation could also apply to the six-armed case. The rigid skeletal  
268 partitions symmetrically made by six arms (Fig. 4A) would be more dominant in fluid flow,  
269 compared to the flexibly transformable stomach with 12 pouches (Fig. 4C). Our scan also  
270 supports Wakita et al.'s (2018) explanation with six symmetrical nodes for this six-armed  
271 specimen. We thus retain the explanatory power of the pumping network with five or six  
272 symmetrical nodes—not 10 or 12 nodes in two different sizes.

273           Visibility in the original position of gut contents gives two suggestions for the  
274 phenomenon pumping. The first is about its initiation. After a brittle star eats something, food  
275 fragments would be seated at some pouches (Fig. 2C–E); even if a prey stays at the center, its  
276 body shape would never weight equally among all the pouches (Fig. 3C). The contents thus  
277 make the stomach morphology more asymmetric, which might trigger the initiation of a  
278 pumping series as Wakita et al. (2018) let one interradial volume unequal at the beginning of  
279 simulation. The second involves the purpose of pumping. In many animals including humans,  
280 food transfers from the mouth to the anus in one direction; the linear structure guarantees that  
281 nutrients are absorbed point by point. On the other hand, the digestive cavity of brittle stars  
282 has neither unidirectional tracts nor the anus, so a piece might easily stick to a dead end—just  
283 as shown in Fig. 2. Transformation of the stomach by pumping would give more opportunities  
284 to displace the piece with it spreading a nutritious flow. This strategy would be effective in  
285 large-sized species, where gut contents travel longer distances piece by piece. Therefore,  
286 although we used the single species *Ophiarachna incrassata*, other large brittle stars are  
287 supposed to exhibit pumping in a similar manner.

288           CT scanning technique for 3D visualization has been employed by several studies  
289 on brittle stars. Landschoff & Griffiths (2015) revealed how a brooding brittle star

290 accommodates several juveniles inside its body, comparing two species; another was similarly  
291 examined later (MacKinnon et al. 2017). In a taxonomic context, Okanishi et al. (2017)  
292 described skeletal structure of a euryalid brittle star without dissolving its thick skin. Clark et  
293 al. (2018) paid attention to the joint connection of vertebrae to understand the mobility of  
294 arms in two species. Our study would carry a novelty in (1) focusing on the digestive system,  
295 (2) comparing two behavioral conditions (relaxed v.s. pumping), and (3) comparing two  
296 morphologically different individuals within a species (five-armed v.s. six-armed) in CT  
297 scanned brittle stars. Notably, the snapshotting method for (2), where cryogenic ethanol is  
298 poured onto a living animal, is widely applicable for the scanning purpose of body structure  
299 during dynamic movements in echinoderms. These approaches give prominence to a dynamic  
300 digestive process and its relation with body structure, which would be a hot clue to ethology,  
301 ecology, and evolution in echinoderms.

302

303

### **Acknowledgments**

304 This work was partly supported by JSPS KAKENHI (Grant Number 16KT0099), JST CREST  
305 (Grant Number JPMJCR14D5), and Hokkaido University Frontier Foundation (Nitobe School  
306 Financial Assistance), Japan.

307

308

### **Competing interests**

309 The authors declare no competing financial interests.

310

311

### **Author contributions**

312 D.W. and H.A. designed the study, D.W. conducted experiments, H.A. performed

313 micro-computed tomography, K.N. conducted segmentation, D.W. drafted the manuscript and  
314 prepared figures and videos, K.N. and H.A. revised the manuscript, and all the authors  
315 approved the article.

316

317

## References

318 Ambrose WG Jr (1993) Effects of predation and disturbance by ophiuroids on soft-bottom  
319 community structure in Oslofjord: results of a mesocosm study. *Mar Ecol Prog Ser* **97**,  
320 225–236. <https://doi.org/10.3354/meps097225>.

321 Clark EG, Hutchinson JR, Darroch SA, Mongiardino Koch N, Brady TR, Smith SA, Briggs  
322 DE (2018) Integrating morphology and in vivo skeletal mobility with digital models to  
323 infer function in brittle star arms. *J Anat* **233**, 696–714.  
324 <https://doi.org/10.1111/joa.12887>.

325 Fell HB (1963) The phylogeny of sea-stars. *Philos T R Soc B* **246**, 381–435.  
326 <https://doi.org/10.1098/rstb.1963.0010>.

327 Fontaine AR (1965) The feeding mechanisms of the ophiuroid *Ophiocomina nigra*. *J Mar*  
328 *Biol Assoc UK* **45**, 373–385. <https://doi.org/10.1017/S0025315400054904>.

329 Frolova LT, Dolmatov IY (2006) Regeneration of the epithelial lining of the stomach after  
330 autotomy of a disk in the brittle star *Amphipholis kochii* (Lütken) (Echinodermata:  
331 Ophiuroidea). *Russ J Mar Biol* **32**, 68–70.  
332 <https://doi.org/10.1134/S106307400601010X>.

333 Frolova LT, Dolmatov IY (2010) Microscopic anatomy of the digestive system in normal and  
334 regenerating specimens of the brittlestar *Amphipholis kochii*. *Biol Bull* **218**, 303–316.  
335 <https://doi.org/10.1086/BBLv218n3p303>.



- 336 Hendler G, Miller JE (1984) Feeding behavior of *Asteroporpa annulata*, a gorgonocephalid  
337 brittlestar with unbranched arms. *B Mar Sci* **34**, 449–460. <https://doi.org/10088/8751>.
- 338 Lamarck JD (1816) Ordre second: radiaires échinodermes. In: *Histoire Naturelle des Animaux*  
339 *sans Vertèbres 2* (ed. Lamarck JD), pp. 522–568. Paris: Verdière, Libraire, quai des  
340 Augustins, No. 27. <https://doi.org/10.5962/bhl.title.12712>.
- 341 Landschoff J, Griffiths CL (2015) Three-dimensional visualisation of brooding behaviour in  
342 two distantly related brittle stars from South African waters. *Afr J Mar Sci* **37**, 533–541.  
343 <https://doi.org/10.2989/1814232X.2015.1095801>.
- 344 MacKinnon RB, Landschoff J, Griffiths CL (2017) Seasonality and 3D-visualization of  
345 brooding in the hermaphroditic ophiuroid *Amphiura capensis*. *Invertebr Biol* **136**,  
346 146–158. <https://doi.org/10.1111/ivb.12164>.
- 347 Metscher BD (2009) MicroCT for comparative morphology: simple staining methods allow  
348 high-contrast 3D imaging of diverse non-mineralized animal tissues. *BMC Physiol* **9**, 11.  
349 <https://doi.org/10.1186/1472-6793-9-11>.
- 350 Nagabhushanam AK, Colman JS (1959) Carrion-eating by ophiuroids. *Nature* **184**, 285.  
351 <https://doi.org/10.1038/184285a0>.
- 352 Okanishi M, Fujita T, Maekawa Y, Sasaki T (2017) Non-destructive morphological  
353 observations of the fleshy brittle star, *Asteronyx loveni* using micro-computed  
354 tomography (Echinodermata, Ophiuroidea, Euryalida). *ZooKeys* **663**, 1–19.  
355 <https://doi.org/10.3897/zookeys.663.11413>.
- 356 Pearson M, Gage JD (1984) Diets of some deep-sea brittle stars in the Rockall Trough. *Mar*  
357 *Biol* **82**, 247–258. <https://doi.org/10.1007/BF00392406>.
- 358 Pentreath RJ (1969) The morphology of the gut and a qualitative review of digestive enzymes

- 359 in some New Zealand ophiuroids. *J Zool* **159**, 413–423.
- 360 <https://doi.org/10.1111/j.1469-7998.1969.tb03898.x>.
- 361 Pentreath RJ (1971) Respiratory surfaces and respiration in three New Zealand intertidal  
362 ophiuroids. *J Zool* **163**, 397–412. <https://doi.org/10.1111/j.1469-7998.1971.tb04540.x>.
- 363 Reimer RD, Reimer AA (1975) Chemical control of feeding in four species of tropical  
364 ophiuroids of the genus *Ophioderma*. *Comp Biochem Phys A* **51**, 915–927.  
365 [https://doi.org/10.1016/0300-9629\(75\)90075-4](https://doi.org/10.1016/0300-9629(75)90075-4).
- 366 Schechter J, Lucero J (1968) A light and electron microscopic investigation of the digestive  
367 system of the ophiuroid *Ophiuroiderma panamensis* (brittle star). *J Morphol* **124**,  
368 451–481. <https://doi.org/10.1002/jmor.1051240405>.
- 369 Smith J (1940) The reproductive system and associated organs of the brittle-star *Ophiothrix*  
370 *fragilis*. *J Cell Sci* **2**, 267–309.
- 371 Stöhr S, O’Hara T, Thuy B (2019) World Ophiuroidea Database.  
372 <http://www.marinespecies.org/ophiuroida>. Accessed 29 April 2019.  
373 <https://doi.org/10.14284/358>.
- 374 Uchida T, Irimura S (1974) Ophiuroidea. In: *The Systematic Zoology 8B* (ed. Uchida T), pp  
375 142–207. Tokyo: Nakayama Book Company.
- 376 Wakita D, Hayase Y, Aonuma H (2018) Five breaks synchrony while six keeps synchrony:  
377 individual difference in the coordinated pattern of five- and six-armed brittle stars.  
378 *BioRxiv*, 340471. <https://doi.org/10.1101/340471>.
- 379 Warner GF (1971) On the ecology of a dense bed of the brittle-star *Ophiothrix fragilis*. *J Mar*  
380 *Biol Assoc UK* **51**, 267–282. <https://doi.org/10.1017/S0025315400031775>.
- 381

382

383

### Supporting Information

384 **Video S1.** Rhythmic movement “pumping” in a five-armed individual of the green brittle star

385 *Ophiarachna incrassata*.

386 **Video S2.** 3D animation of the images shown in Fig. 2 (five-armed relaxed individual).

387 **Video S3.** 3D animation of the images shown in Fig. 3 (five-armed pumping individual).

388 **Video S4.** 3D animation of the images shown in Fig. 4 (six-armed relaxed individual).
